# Supplementary material
Source: Springer Nature journal article supplement (https://www.springermedizin.de/resource/supplementary/13231_2012_71_MOESM1_ESM.pdf/9676480)

Mean  $\pm$  Standard Deviation of the Neurological deficit

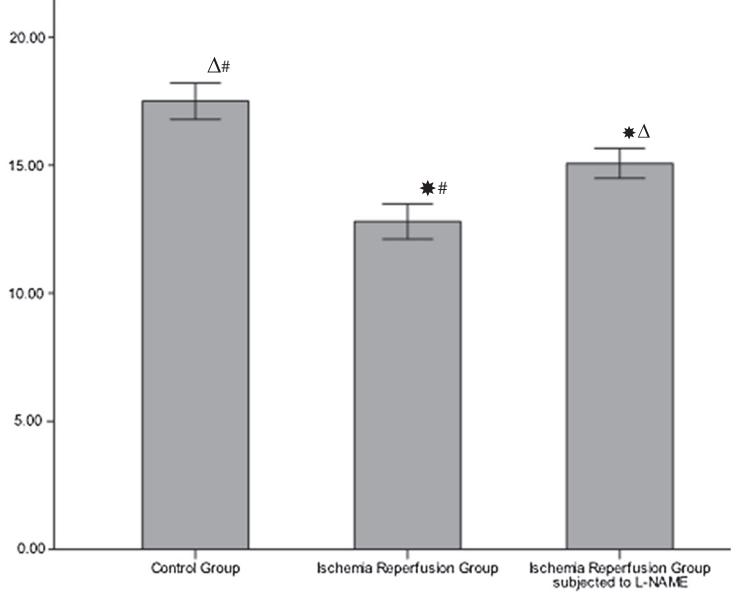

Supplement: MOESM1 [file 9676480]
